# Supplementary material for: Dependence of Quantum Dot Toxicity In Vitro on Their Size, Chemical Composition, and Surface Charge
Source: MDPI journal article supplement (doi:10.3390/nano12162734), 2022-08-09
Supplement: s1 [file s1]

# Supplementary Materials

## Dependence of Quantum Dot Toxicity In Vitro on Their Size, Chemical Composition, and Surface Charge

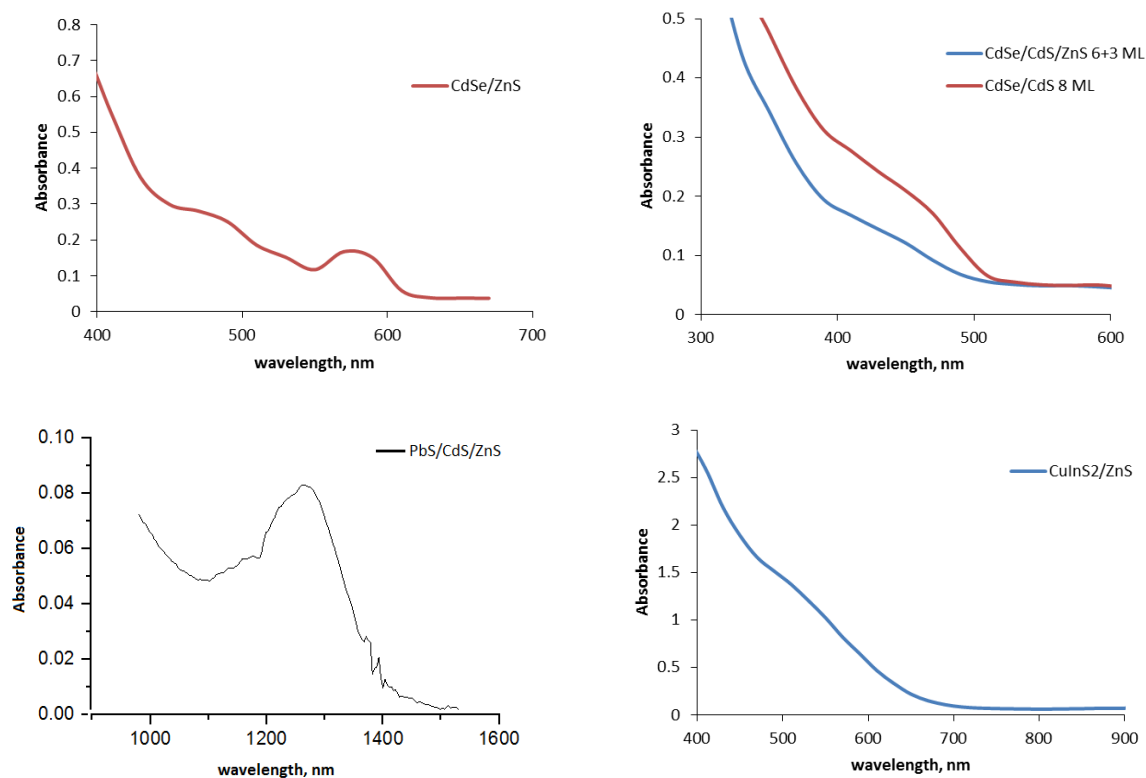

Figure S1. Absorption spectra of the as-synthesized water-insoluble quantum dots.

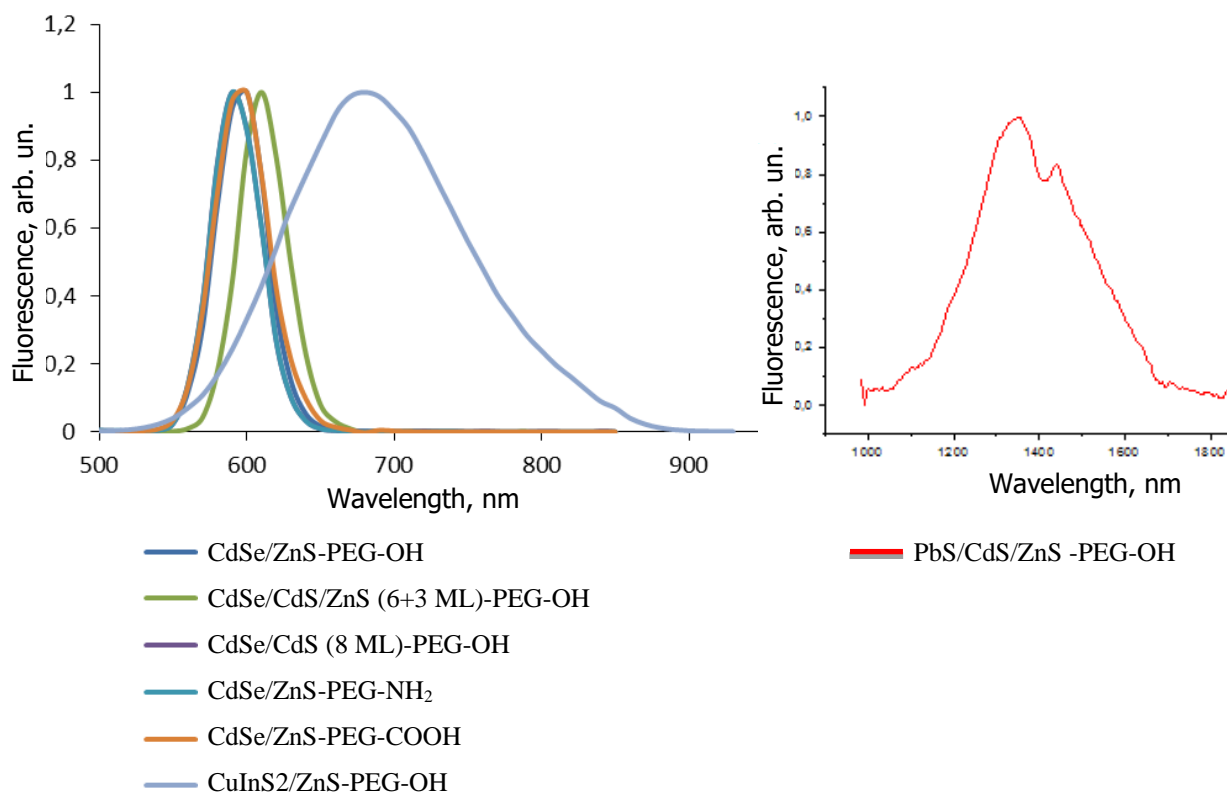

**Figure S2.** Fluorescence spectra of quantum dots modified with polyethylene glycol derivatives.
